# Supplementary material for: Effect of a Topical Collagen Tripeptide on Antiaging and Inhibition of Glycation of the Skin: A Pilot Study
Source: MDPI journal article supplement (doi:10.3390/ijms23031101), 2022-01-20

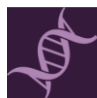

*Supplementary Materials*

# Effect of a topical collagen tripeptide on antiaging and inhibition of glycation of the skin: A prospective, single-arm clinical trial

Young In Lee <sup>1,2,†</sup>, Sang Gyu Lee <sup>1,†</sup>, Inhee Jung <sup>3</sup>, Jangmi Suk <sup>3</sup>, Mon-Hoe Lee <sup>4</sup>, Do-Un Kim <sup>4</sup>, Ju Hee Lee <sup>1,2,\*</sup>

<sup>1</sup> Department of Dermatology & Cutaneous Biology Research Institute, Yonsei University College of Medicine, Seoul 03722, Korea; ylee1124@yuhs.ac (Y.I.L.); dltkdrb5658@yuhs.ac (S.G.L.)

<sup>2</sup> Scar Laser and Plastic Surgery Center, Yonsei Cancer Hospital, Seoul 03722, Korea

<sup>3</sup> Global Medical Research Center, Seoul 06526, Korea; ihjung@gmrc.co.kr (I.J.); rose@gmrc.co.kr (J.S.)

<sup>4</sup> Health Food Research and Development, NewTree Co., Ltd., Seoul 05604, Korea; mhlee@inewtree.com (M-H.L.); dkim@inewtree.com (D-U.K.)

\* Correspondence: juhee@yuhs.ac; Tel.: +82-2-2228-2080

† These authors made equal contributions.

## 1. Supplementary Table

Supplementary Table S1. Overall clinical studies data outcomes.

|                                                   | Improvement (%) | Baseline         | 4 weeks          | <i>p</i> value    |
|---------------------------------------------------|-----------------|------------------|------------------|-------------------|
|                                                   |                 | Mean ± SD        | Mean ± SD        |                   |
| <i>The periorbital skin roughness</i>             | - 7.394         | 20.774 ± 3.506   | 19.238 ± 3.523   | # <i>p</i> <0.001 |
| <i>The glabella skin roughness</i>                | - 5.557         | 21.395 ± 3.094   | 20.206 ± 2.833   | * <i>p</i> <0.001 |
| <i>The maximum periorbital skin roughness</i>     | - 4.762         | 191.106 ± 32.583 | 182.005 ± 33.629 | * <i>p</i> <0.001 |
| <i>The maximum glabella skin roughness</i>        | - 5.973         | 169.924 ± 21.574 | 159.775 ± 21.577 | # <i>p</i> <0.001 |
| <i>The depth of periorbital wrinkles</i>          | - 4.918         | 0.061 ± 0.010    | 0.058 ± 0.010    | # <i>p</i> <0.001 |
| <i>Skin density</i>                               | 7.210           | 55.655 ± 7.611   | 59.668 ± 7.841   | # <i>p</i> <0.001 |
| <i>Skin collagen strength</i>                     | 3.253           | 68.023 ± 5.476   | 70.236 ± 5.140   | # <i>p</i> <0.001 |
| <i>Skin surface elasticity</i>                    | 1.961           | 0.816 ± 0.032    | 0.832 ± 0.029    | * <i>p</i> <0.001 |
| <i>Advanced Glycated End products measurement</i> | - 4.253         | 2.257 ± 0.322    | 2.161 ± 0.289    | # <i>p</i> <0.001 |

#*p*: by Wilcoxon signed rank test; \**p*: by Paired samples t-test

Supplementary Table S2. Primer sequence for qRT-PCR.

| Gene          | Forward primer (5'-3') | Reverse primer (5'-3') |
|---------------|------------------------|------------------------|
| <i>COL1A1</i> | GATTCCCTGGACCTAAAGGTGC | AGCCTCTCCATCTTTGCCAGCA |
| <i>MMP1</i>   | ATGAAGCAGCCCAGATGTGGAG | TGGTCCACATCTGCTCTTGGCA |
| <i>MMP3</i>   | CACTCACAGACCTGACTCGGTT | AAGCAGGATCACAGTTGGCTGG |
| <i>MMP9</i>   | GCCACTACTGTGCCTTTGAGTC | CCCTCAGAGAATCGCCAGTACT |
| <i>GAPDH</i>  | GTCTCCTCTGACTTCAACAGAG | ACCACCCTGTTGCTGTAGCCAA |

Supplementary Table S3. The total ingredients of Ever Collagen Corrector Collagen Tripeptide Ampoule

| Ingredient name              |                                            |                                     |
|------------------------------|--------------------------------------------|-------------------------------------|
| Water                        | Helianthus Annuus (Sunflower) Seed Oil     | Hydrogenated Polydecene             |
| Glycerin                     | Adansonia Digitata Seed Oil                | Hydroxyacetophenone                 |
| Propanediol                  | Hyaluronic Acid                            | Hydrogenated Lecithin               |
| Isododecane                  | Hydrolyzed Hyaluronic Acid                 | Polyglyceryl-10 Oleate              |
| Butylene Glycol              | Leontopodium Alpinum Callus CultureExtract | C12-20 Alkyl Glucoside              |
| Cyclohexasiloxane            | Milk Protein Extract                       | Carbomer                            |
| Niacinamide                  | Akebia Quinata Extract                     | Sodium Polyacryloyldimethyl Taurate |
| Diphenyl Dimethicone         | Sambucus Nigra Fruit Extract               | Biosaccharide Gum-1                 |
| Cetyl Ethylhexanoate         | C14-22 Alcohols                            | Tromethamine                        |
| Silica                       | Glycereth-26                               | Maltodextrin                        |
| Triethylhexanoin             | 1,2-Hexanediol                             | Saccharide Hydrolysate              |
| Hydrolyzed Fish Skin Extract | Glyceryl Stearate                          | Adenosine                           |
| Tocopherol                   | Sorbitan Stearate                          | Ethylhexylglycerin                  |
| Betaine                      | Dimethicone/Vinyl Dimethicone Crosspolymer | Hydroxyethylcellulose               |
| Disodium EDTA                | Ammonium Polyacryloyldimethyl Taurate      | Rosa Damascena Flower Water         |
| Trideceth-10                 | Soluble Proteoglycan                       | Caprylyl Glycol                     |
| Sodium Hyaluronate           | Glucose                                    | Fragrance                           |

## 2. Supplementary Figure

Supplementary Figure S1. Cell cytotoxicity of EverCTP™ depending on the concentration in the HDF cell. There was no cell cytotoxicity effect on 10, 250, 500 and 1000 µg/ml EverCTP™ treatment.

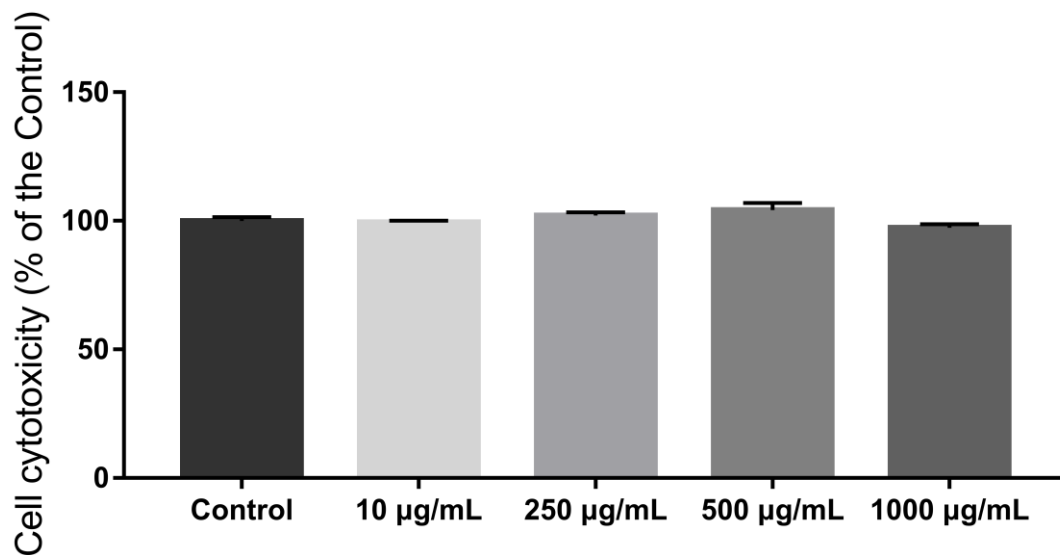

Supplement: s1 [file s1]
